# Supplementary material for: Investigation of the effects of Periplaneta americana (L.) extract on ischemic stroke based on combined multi-omics of gut microbiota
Source: Front Pharmacol. 2024 Nov 28;15:1429960. doi: 10.3389/fphar.2024.1429960 (PMC11638836; doi:10.3389/fphar.2024.1429960)
Supplement: Supplementary file 4 [file Table1.XLSX]

## Sheet: Sheet1
ID	name	mz	rt	exact_mass	ppm	formula	precursor_type	class	sub_class	KEGG	KEGG_Pathway	CAS	hmdb	level	posneg	PAS840
M138T570	2-Aminobenzoic acid	138.054	570	137.048	3.4479	C7H7NO2	[M+H]+	Benzene and substituted derivatives	Amines	C00108	Skeleton-based classification; Biosynthesis of other secondary metabolites; Xenobiotics biodegradation and metabolism; Amino acid metabolism; Chemical structure transformation maps; Global and overview maps	118-92-3	HMDB0001123	2	pos	1.36603e+08
M166T984	L-beta-Phenylalanine	166.087	984.1	165.079	4.96128	C9H11NO2	[M+H]+			C20487				2	pos	3.2664e+08
M166T125_1	D-beta-Phenylalanine	166.086	124.9	165.079	4.07017	C9H11NO2	[M+H]+			C20488				2	pos	3.40054e+08
M279T511	6-Tuliposide A	279.112	510.9	278.1	16.5671	C11H18O8	[M+H]+			C20577		19870-31-6		2	pos	2.98378e+07
M111T866	Pyrrole-2-carboxylic acid	111.02	866.3	111.032	2.33485	C5H5NO2	[M]+	Pyrroles	Pyrrole carboxylic acids and derivatives	C05942	Amino acid metabolism	634-97-9	HMDB0004230	2	pos	8.62101e+07
M113T182	Uracil	113.035	182.5	112.027	0.98004	C4H4N2O2	[M+H]+	Diazines	Pyrimidines and pyrimidine derivatives	C00106	Metabolism of cofactors and vitamins; Metabolism of other amino acids; Global and overview maps; Nucleotide metabolism	66-22-8	HMDB0000300	2	pos	2.72482e+08
M116T553	L-Proline	116.07	553	115.063	1.51632	C5H9NO2	[M+H]+	Carboxylic acids and derivatives	Amino acids, peptides, and analogues	C00148	Cancer: overview; Membrane transport; Digestive system; Biosynthesis of other secondary metabolites; Translation; Amino acid metabolism; Global and overview maps	147-85-3	HMDB0000162	2	pos	1.1453e+08
M118T488	Indole	118.065	488.1	117.058	0.643713	C8H7N	[M+H]+	Indoles and derivatives	Indoles	C00463	Amino acid metabolism; Biosynthesis of other secondary metabolites; Global and overview maps; Digestive system	120-72-9	HMDB0000738	2	pos	7.80249e+07
M118T126	Guanidoacetic acid	118.065	125.9	117.054	29.4462	C3H7N3O2	[M+H]+	Carboxylic acids and derivatives	Amino acids, peptides, and analogues	C00581	Amino acid metabolism; Global and overview maps	352-97-6	HMDB0000128	2	pos	6.28393e+08
M118T120	L-Valine	118.086	120.3	117.079	1.49044	C5H11NO2	[M+H]+	Carboxylic acids and derivatives	Amino acids, peptides, and analogues	C00183	Cancer: overview; Metabolism of cofactors and vitamins; Metabolism of other amino acids; Membrane transport; Digestive system; Biosynthesis of other secondary metabolites; Translation; Amino acid metabolism; Chemical structure transformation maps; Global and overview maps	72-18-4	HMDB0000883	2	pos	1.4448e+09
M118T674	5-Aminopentanoic acid	118.086	673.7	117.079	1.76487	C5H11NO2	[M+H]+	Carboxylic acids and derivatives	Amino acids, peptides, and analogues	C00431	Amino acid metabolism; Global and overview maps	660-88-8	HMDB0003355	2	pos	6.58054e+07
M137T890	Phenyl acetate	137.059	890.3	136.052	0.908629	C8H8O2	[M+H]+			C00548		122-79-2		2	pos	6.8855e+07
M138T451	Tyramine	138.091	451.5	137.084	0.550361	C8H11NO	[M+H]+	Benzene and substituted derivatives	Phenethylamines	C00483	Chemical structure transformation maps; Digestive system; Biosynthesis of other secondary metabolites; Signaling molecules and interaction; Amino acid metabolism; Energy metabolism; Global and overview maps	51-67-2	HMDB0000306	2	pos	5.35253e+08
M138T478	2-Hydroxyphenethylamine	138.091	477.6	137.084	0.550361	C8H11NO	[M+H]+	Organonitrogen compounds	Amines	C02735		7568-93-6	HMDB0001065	2	pos	1.02983e+08
M121T633	4-Hydroxystyrene	121.028	633	120.058	11.4021	C8H8O	[M+H]+	Benzene and substituted derivatives	Styrenes	C05627	Biosynthesis of other secondary metabolites	2628-17-3	HMDB0004072	2	pos	2.58131e+07
M121T451	Tyrosol	121.065	451.5	138.068	0.335261	C8H10O2	[M+H-H2O]+	Phenols	Tyrosols and derivatives	C06044	Amino acid metabolism; Global and overview maps	501-94-0	HMDB0004284	2	pos	3.19521e+09
M123T72_2	(S)-1-Phenylethanol	123.04	71.6	122.073	1.77856	C8H10O	[M+H]+			C11348	Xenobiotics biodegradation and metabolism; Global and overview maps	1445-91-6		2	pos	3.5696e+08
M124T131	Nicotinic acid	124.075	131	123.032	1.05586	C6H5NO2	[M+H]+	Pyridines and derivatives	Pyridinecarboxylic acids and derivatives	C00253	Metabolism of cofactors and vitamins; Biosynthesis of other secondary metabolites; Infectious disease: bacterial; Chemical structure transformation maps; Global and overview maps	59-67-6	HMDB0001488	2	pos	5.17383e+08
M123T118	3-Hydroxybenzaldehyde	123.044	118.5	122.037	0.690747	C7H6O2	[M+H]+			C03067	Xenobiotics biodegradation and metabolism; Global and overview maps	100-83-4		2	pos	1.83932e+08
M140T602	Phosphonoacetate	140.07	601.7	139.988	14.6775	C2H5O5P	[M]+	Organic phosphonic acids and derivatives	Organic phosphonic acids	C05682	Metabolism of other amino acids; Global and overview maps	4408-78-0	HMDB0004110	2	pos	3.49506e+07
M124T840	Picolinic acid	124.087	839.8	123.032	0.524705	C6H5NO2	[M+H]+	Pyridines and derivatives	Pyridinecarboxylic acids and derivatives	C10164	Amino acid metabolism; Global and overview maps	98-98-6 / 14639-25-9	HMDB0002243	2	pos	2.64932e+08
M127T95	Thymine	127.051	95.3	126.043	3.93544	C5H6N2O2	[M+H]+	Diazines	Pyrimidines and pyrimidine derivatives	C00178	Global and overview maps; Nucleotide metabolism	65-71-4	HMDB0000262	2	pos	5.6127e+07
M130T87	Pipecolic acid	130.086	87.2	129.079	1.35295	C6H11NO2	[M+H]+	Carboxylic acids and derivatives	Amino acids, peptides, and analogues	C00408	Chemical structure transformation maps; Amino acid metabolism; Biosynthesis of other secondary metabolites; Global and overview maps	535-75-1 / 3105-95-1	HMDB0000070	2	pos	9.56909e+07
M130T88	Pyroglutamic acid	130.05	88.3	129.043	0.184545	C5H7NO3	[M+H]+	Carboxylic acids and derivatives	Amino acids, peptides, and analogues	C01879	Metabolism of other amino acids; Global and overview maps	98-79-3	HMDB0000267	2	pos	1.05445e+08
M132T387	3-Methylindole	132.081	387.1	131.073	0.785394	C9H9N	[M+H]+	Indoles and derivatives	Indoles	C08313	Amino acid metabolism	83-34-1	HMDB0000466	2	pos	1.28311e+09
M132T592	L-Leucine	132.102	592.4	131.095	2.0893	C6H13NO2	[M+H]+	Carboxylic acids and derivatives	Amino acids, peptides, and analogues	C00123	Membrane transport; Signal transduction; Digestive system; Biosynthesis of other secondary metabolites; Translation; Amino acid metabolism; Chemical structure transformation maps; Global and overview maps	61-90-5	HMDB0000687	2	pos	2.12656e+08
M137T311_1	Hypoxanthine	137.046	310.6	136.038	0.446091	C5H4N4O	[M+H]+	Imidazopyrimidines	Purines and purine derivatives	C00262	Global and overview maps; Nucleotide metabolism	68-94-0	HMDB0000157	2	pos	2.25849e+09
M138T105	p-Aminobenzoic acid	138.096	105.2	137.048	8.85032	C7H7NO2	[M+H]+	Benzene and substituted derivatives	Benzoic acids and derivatives	C00568	Chemical structure transformation maps; Metabolism of cofactors and vitamins; Xenobiotics biodegradation and metabolism; Global and overview maps	150-13-0 / 2906-28-7	HMDB0001392	2	pos	5.51322e+07
M146T382	Spermidine	146.129	382.1	145.158	0.0504558	C7H19N3	[M+H]+	Organonitrogen compounds	Amines	C00315	Membrane transport; Metabolism of other amino acids; Digestive system; Biosynthesis of other secondary metabolites; Metabolism of terpenoids and polyketides; Amino acid metabolism; Global and overview maps	124-20-9	HMDB0001257	2	pos	6.73418e+07
M145T983	3-Hydroxymethylglutaric acid	144.983	982.6	162.053	2.54981	C6H10O5	[M+H-H2O]+	Fatty Acyls	Fatty acids and conjugates	C03761		503-49-1	HMDB0000355	2	pos	1.97863e+08
M145T395	Anabasine	145.105	394.6	162.116	21.8187	C10H14N2	[M+H-H2O]+			C06180	Chemical structure transformation maps; Biosynthesis of other secondary metabolites; Global and overview maps	13078-04-1 / 494-52-0	HMDB0004350	2	pos	2.41575e+08
M148T339	L-Glutamic acid	148.112	339.4	147.053	24.1564	C5H9NO4	[M+H]+	Carboxylic acids and derivatives	Amino acids, peptides, and analogues	C00025	Neurodegenerative disease; Biosynthesis of other secondary metabolites; Substance dependence; Cellular community - eukaryotes; Energy metabolism; Metabolism of other amino acids; Excretory system; Carbohydrate metabolism; Cancer: overview; Membrane transport; Cell growth and death; Signal transduction; Nervous system; Digestive system; Environmental adaptation; Amino acid metabolism; Chemical str…	56-86-0	HMDB0000148	2	pos	1.10836e+09
M149T61	L-2-Hydroxyglutaric acid	148.977	60.7	148.037	0.909688	C5H8O5	[M+H]+	Fatty Acyls	Fatty acids and conjugates	C03196	Amino acid metabolism; Global and overview maps	13095-48-2	HMDB0000694	2	pos	2.11236e+07
M149T823	3-Methyladenine	149.024	822.7	149.07	3.44544	C6H7N5	[M]+	Imidazopyrimidines	Purines and purine derivatives	C00913		5142-23-4	HMDB0011600	2	pos	4.06846e+06
M153T470	2',4'-Dihydroxyacetophenone	153.102	469.9	152.047	6.15669	C8H8O3	[M+H]+	Benzene and substituted derivatives	Acetophenones	C03663		89-84-9	HMDB0029659	2	pos	1.26204e+08
M155T58	2,3-Butanediol	154.99	57.6	154.012	1.79694	C4H10O2S2	[M+H]+	Organooxygen compounds	Alcohols and polyols	C00265		513-85-9 / 3483-12-3	HMDB0003156	2	pos	1.70565e+08
M180T852	Theophylline	180.064	851.8	180.065	2.77679	C7H8N4O2	[M]+	Imidazopyrimidines	Purines and purine derivatives	C07130	Chemical structure transformation maps; Biosynthesis of other secondary metabolites; Global and overview maps	58-55-9	HMDB0001889	2	pos	2.40369e+08
M166T533	L-Phenylalanine	166.086	533.5	165.079	1.33144	C9H11NO2	[M+H]+			C00079	Cancer: overview; Membrane transport; Metabolism of other amino acids; Digestive system; Biosynthesis of other secondary metabolites; Translation; Amino acid metabolism; Chemical structure transformation maps; Global and overview maps	673-06-3		2	pos	1.35815e+09
M185T487	Phosphoserine	185.165	486.5	185.009	0.75057	C3H8NO6P	[M]+	Carboxylic acids and derivatives	Amino acids, peptides, and analogues	C01005	Biosynthesis of other secondary metabolites; Translation; Amino acid metabolism; Energy metabolism; Global and overview maps	407-41-0	HMDB0000272	2	pos	7.61697e+07
M170T34	Norepinephrine	169.977	33.6	169.074	2.80909	C8H11NO3	[M+H]+	Phenols	Benzenediols	C00547	Circulatory system; Nervous system; Signal transduction; Sensory system; Endocrine system; Digestive system; Environmental adaptation; Signaling molecules and interaction; Amino acid metabolism; Cellular community - eukaryotes; Cellular community - prokaryotes; Global and overview maps	51-41-2	HMDB0000216	2	pos	1.73666e+07
M153T93	3,4-Dihydroxyphenylglycol	153.055	93	170.058	2.61344	C8H10O4	[M+H-H2O]+	Phenols	Benzenediols	C05576	Amino acid metabolism; Global and overview maps	28822-73-3/3343-19-9	HMDB0000318	2	pos	1.01057e+08
M188T386	N-Alpha-acetyllysine	188.07	386.4	188.116	1.77404	C8H16N2O3	[M]+	Carboxylic acids and derivatives	Amino acids, peptides, and analogues	C12989		1946-82-3	HMDB0000446	2	pos	6.25262e+10
M177T59	Methyl beta-D-galactoside	176.972	59.5	194.079	0.143887	C7H14O6	[M+H-H2O]+			C03619	Membrane transport	1824-94-8		2	pos	3.28345e+07
M215T504	Dethiobiotin	215.139	504.2	214.132	0.119124	C10H18N2O3	[M+H]+	Fatty Acyls	Fatty acids and conjugates	C01909	Metabolism of cofactors and vitamins; Global and overview maps	533-48-2	HMDB0003581	2	pos	8.27889e+08
M200T35	Dodecanoic acid	199.988	35.3	200.178	0.58315	C12H24O2	[M]+	Fatty Acyls	Fatty acids and conjugates	C02679	Lipid metabolism; Biosynthesis of other secondary metabolites; Global and overview maps	143-07-7	HMDB0000638	2	pos	1.92148e+07
M224T713	Hydroxykynurenine	224.128	713	224.08	0.142835	C10H12N2O4	[M]+	Organooxygen compounds	Carbonyl compounds	C02794		484-78-6 / 2147-61-7	HMDB0000732	2	pos	8.16575e+07
M226T693	Porphobilinogen	226.179	692.9	226.095	4.7792	C10H14N2O4	[M]+	Organonitrogen compounds	Amines	C00931	Metabolism of cofactors and vitamins; Global and overview maps	487-90-1	HMDB0000245	2	pos	3.88855e+07
M228T935	Deoxyuridine	228.196	934.7	228.075	0.183604	C9H12N2O5	[M]+	Pyrimidine nucleosides	Pyrimidine 2'-deoxyribonucleosides	C00526	Membrane transport; Global and overview maps; Nucleotide metabolism	951-78-0	HMDB0000012	2	pos	5.77656e+07
M252T281	2'-Deoxyadenosine	252.109	281.1	251.102	0.135923	C10H13N5O3	[M+H]+			C00559	Membrane transport; Global and overview maps; Nucleotide metabolism	16373-93-6	HMDB0000101	2	pos	1.83367e+09
M282T901	Oleic acid	282.281	901.3	282.256	6.07749	C18H34O2	[M]+	Fatty Acyls	Fatty acids and conjugates	C00712	Lipid metabolism; Chemical structure transformation maps; Aging	112-80-1	HMDB0000207	2	pos	3.55651e+07
M268T904	DL-Homocystine	268.262	904.1	268.055	4.70967	C8H16N2O4S2	[M]+	Carboxylic acids and derivatives	Amino acids, peptides, and analogues	C01817	Amino acid metabolism	870-93-9 / 626-72-2 / 462-10-2	HMDB0000575	2	pos	8.04212e+07
M282T829	(6Z)-Octadecenoic acid	282.279	828.9	282.256	0.804523	C18H34O2	[M]+			C08363		593-39-5		2	pos	1.05475e+09
M284T290	Guanosine	284.099	290.2	283.092	0.0844776	C10H13N5O5	[M+H]+	Purine nucleosides		C00387	Membrane transport; Global and overview maps; Nucleotide metabolism	118-00-3	HMDB0000133	2	pos	8.40672e+08
M299T795	Nonadecanoic acid	299.257	795.2	298.287	4.13089	C19H38O2	[M+H]+	Fatty Acyls	Fatty acids and conjugates	C16535		646-30-0	HMDB0000772	2	pos	1.19195e+08
M321T904	Pregnanediol	321.314	904.1	320.272	3.35149	C21H36O2	[M+H]+	Steroids and steroid derivatives	Pregnane steroids	C05484	Lipid metabolism; Global and overview maps	80-92-2	HMDB0004025	2	pos	9.91266e+08
M338T944	Erucic acid	338.338	943.9	338.318	4.79994	C22H42O2	[M-H2O+NH4]+	Fatty Acyls	Fatty acids and conjugates	C08316	Lipid metabolism	112-86-7	HMDB0002068	2	pos	7.44297e+08
M393T799	Deoxycholic acid	393.284	799	392.293	4.0598	C24H40O4	[M+H]+	Steroids and steroid derivatives	Bile acids, alcohols and derivatives	C04483	Lipid metabolism; Digestive system	83-44-3	HMDB0000626	2	pos	3.68827e+07
M415T805	Sodium deoxycholate	415.211	804.8	414.275	2.21942	C24H39O4. Na	[M+H]+			C11171		302-95-4		2	pos	6.08409e+08
M117T119	Deoxyribose	117.055	118.9	134.058	0.934718	C5H10O4	[M+H-H2O]+	Organooxygen compounds	Carbohydrates and carbohydrate conjugates	C01801	Carbohydrate metabolism; Global and overview maps	533-67-5	HMDB0003224	2	pos	7.08757e+06
M127T640	1,2,3-Trihydroxybenzene	127.039	639.6	126.032	0.598242	C6H6O3	[M+H]+	Benzene and substituted derivatives	Phenols and derivatives	C01108	Xenobiotics biodegradation and metabolism; Global and overview maps; Target-based classification: Enzymes	87-66-1	HMDB0013674	2	pos	8.25078e+07
M128T360_2	(S)-2-Propylpiperidine	128.143	359.8	127.136	0	C8H17N	[M+H]+			C06523	Chemical structure transformation maps	458-88-8	HMDB0030285	2	pos	4.91012e+07
M131T75	Agmatine	131.129	75.3	130.122	0.579582	C5H14N4	[M+H]+	Organonitrogen compounds	Guanidines	C00179	Amino acid metabolism; Global and overview maps	306-60-5	HMDB0001432	2	pos	2.00271e+08
M131T106	N-Acetylputrescine	131.118	105.8	130.111	1.34231	C6H14N2O	[M+H]+	Carboximidic acids and derivatives	Carboximidic acids	C02714	Amino acid metabolism; Global and overview maps	18233-70-0/5699-41-2	HMDB0002064	2	pos	2.8353e+08
M135T113	Ortho-Hydroxyphenylacetic acid	135.043	113.3	152.047	25.4289	C8H8O3	[M+H-H2O]+	Benzene and substituted derivatives	Phenylacetic acids	C05852	Amino acid metabolism; Xenobiotics biodegradation and metabolism; Global and overview maps	614-75-5	HMDB0000669	2	pos	3.36757e+08
M136T326	Adenine	136.061	325.9	135.054	7.90824	C5H5N5	[M+H]+	Imidazopyrimidines	Purines and purine derivatives	C00147	Metabolism of terpenoids and polyketides; Global and overview maps; Nucleotide metabolism	73-24-5	HMDB0000034	2	pos	6.67762e+08
M136T529_2	p-Octopamine	136.075	528.6	153.079	24.5012	C8H11NO2	[M+H-H2O]+	Phenols	1-hydroxy-2-unsubstituted benzenoids	C04227	Signaling molecules and interaction	104-14-3	HMDB0004825	2	pos	2.37486e+08
M154T406	Dopamine	154.086	406.5	153.079	1.79121	C8H11NO2	[M+H]+	Phenols	Benzenediols	C03758	Nervous system; Signal transduction; Digestive system; Endocrine system; Neurodegenerative disease; Biosynthesis of other secondary metabolites; Signaling molecules and interaction; Amino acid metabolism; Substance dependence; Cellular community - eukaryotes; Chemical structure transformation maps; Global and overview maps	62-31-7/51-61-6	HMDB0000073	2	pos	7.34632e+08
M144T321	5-(2-Hydroxyethyl)-4-methylthiazole	144.048	320.8	143.041	1.22182	C6H9NOS	[M+H]+	Azoles	Thiazoles	C04294	Metabolism of cofactors and vitamins; Global and overview maps	137-00-8	HMDB0032985	2	pos	6.73276e+09
M161T326	Hydralazine	161.082	325.6	160.075	1.09261	C8H8N4	[M+H]+	Diazanaphthalenes	Benzodiazines	C07040		86-54-4	HMDB0015400	2	pos	2.40746e+08
M147T127_1	4-Hydroxycinnamic acid	147.044	127	164.047	26.7539	C9H8O3	[M+H-H2O]+	Cinnamic acids and derivatives	Hydroxycinnamic acids and derivatives	C00811	Metabolism of cofactors and vitamins; Biosynthesis of other secondary metabolites; Amino acid metabolism; Chemical structure transformation maps; Global and overview maps	7400-08-0/7400-08-0 501-98-4/501-98-4	HMDB0002035	2	pos	2.56832e+08
M147T308	L-Glutamine	147.08	307.7	146.069	26.5161	C5H10N2O3	[M+H]+	Carboxylic acids and derivatives	Amino acids, peptides, and analogues	C00064	Cancer: overview; Metabolism of cofactors and vitamins; Chemical structure transformation maps; Membrane transport; Nervous system; Excretory system; Digestive system; Carbohydrate metabolism; Nucleotide metabolism; Translation; Amino acid metabolism; Energy metabolism; Global and overview maps	5959-95-5	HMDB0003423	2	pos	6.01629e+08
M166T573	Edrophonium	166.122	573.3	166.123	5.4177	C10H16NO	[M]+	Benzene and substituted derivatives	Aniline and substituted anilines	C06976		116-38-1/312-48-1	HMDB0015145	2	pos	1.21871e+08
M177T323	Serotonin	177.102	323.4	176.095	1.12929	C10H12N2O	[M+H]+	Indoles and derivatives	Tryptamines and derivatives	C00780	Nervous system; Signal transduction; Sensory system; Digestive system; Target-based classification: G protein-coupled receptors; Development and regeneration; Signaling molecules and interaction; Amino acid metabolism; Cellular community - eukaryotes; Chemical structure transformation maps; Global and overview maps	50-67-9	HMDB0000259	2	pos	4.83531e+08
M160T340	Pargyline	160.112	339.9	159.105	0.474668	C11H13N	[M+H]+	Benzene and substituted derivatives	Phenylmethylamines	C07414		555-57-7/306-07-0	HMDB0015563	2	pos	2.69471e+08
M147T363	Eugenol	147.08	363.5	164.084	27.4272	C10H12O2	[M+H-H2O]+	Phenols	Methoxyphenols	C10453	Biosynthesis of other secondary metabolites	97-53-0	HMDB0005809	2	pos	3.48306e+08
M166T482	Formylanthranilic acid	166.05	482.5	165.043	0.457694	C8H7NO3	[M+H]+	Benzene and substituted derivatives	Benzoic acids and derivatives	C05653	Amino acid metabolism; Global and overview maps	3342-77-6	HMDB0004089	2	pos	6.09299e+07
M175T379	Demethylated antipyrine	175.087	378.8	174.079	3.49003	C10H10N2O	[M+H]+	Azoles	Pyrazoles	C13008		89-25-8	HMDB0006240	2	pos	6.28072e+08
M193T428	Myristicin	193.086	428.3	192.079	0.124297	C11H12O3	[M+H]+	Benzodioxoles		C10480		607-91-0	HMDB0035873	2	pos	2.91814e+08
M194T985	Orciprenaline	194.117	985.4	211.121	16.1449	C11H17NO3	[M+H-H2O]+	Phenols	Benzenediols	C07144		586-06-1	HMDB0014954	2	pos	4.56426e+07
M194T601	Isoproterenol	194.118	600.6	211.121	22.8418	C11H17NO3	[M+H-H2O]+	Phenols	Benzenediols	C07056	Circulatory system	7683-59-2	HMDB0015197	2	pos	1.42781e+08
M198T316	Kinetin	198.076	315.9	215.081	15.8222	C10H9N5O	[M+H-H2O]+	Imidazopyrimidines	Purines and purine derivatives	C08272		525-79-1	HMDB0012245	2	pos	1.33273e+08
M205T333	Alanyltryptophan	205.098	332.6	204.09	2.92543	C11H12N2O2	[M+H]+	Carboxylic acids and derivatives	Amino acids, peptides, and analogues	C00806		54-12-6	HMDB0013209	2	pos	4.25085e+08
M209T99	Carnosine	209.103	99	226.107	18.8137	C9H14N4O3	[M+H-H2O]+	Peptidomimetics	Hybrid peptides	C00386	Amino acid metabolism; Metabolism of other amino acids; Global and overview maps	305-84-0	HMDB0000033	2	pos	1.25423e+09
M209T405	Pilocarpine	209.129	404.7	208.121	0.29722	C11H16N2O2	[M+H]+			C07474	Chemical structure transformation maps; Global and overview maps	54-71-7 / 92-13-7	HMDB0015217	2	pos	3.7087e+08
M202T93	Pantothenate	202.108	93	219.111	23.4231	C9H17NO5	[M+H-H2O]+	Alcohols and polyols	Polyols	C00864	Metabolism of cofactors and vitamins; Metabolism of other amino acids; Global and overview maps; Digestive system	c("79-83-4", "20938-62-9", "599-54-2")	HMDB0000210	2	pos	9.51204e+07
M249T283	Pyrimethamine	249.086	283.1	248.083	16.7653	C12H13ClN4	[M+H]+	Diazines	Pyrimidines and pyrimidine derivatives	C07391		58-14-0	HMDB0014350	2	pos	6.68213e+08
M252T551	N-Acetyl-L-tyrosine	252.122	550.6	251.116	4.7596	C13H17NO4	[M+H]+	Carboxylic acids and derivatives	Amino acids, peptides, and analogues	C01657		537-55-3/840-97-1	HMDB0000866	2	pos	9.19364e+08
M286T476	Hydromorphone	286.144	476.3	285.137	0	C17H19NO3	[M+H]+	Morphinans		C07042		466-99-9	HMDB0014472	2	pos	5.22138e+08
M277T500	Aspartame	277.118	500	294.122	14.9178	C14H18N2O5	[M+H-H2O]+	Carboxylic acids and derivatives	Amino acids, peptides, and analogues	C11045	Sensory system	22839-47-0	HMDB0001894	2	pos	2.24631e+09
M282T973	Sphingosine	282.275	972.6	299.282	0.828978	C18H37NO2	[M+H-H2O]+	Organonitrogen compounds	Amines	C00319	Lipid metabolism; Cell growth and death; Signal transduction; Global and overview maps	123-78-4	HMDB0000252	2	pos	8.66668e+07
M306T579	Capsaicin	306.206	579.2	305.199	0.574776	C18H27NO3	[M+H]+	Phenols	Methoxyphenols	C06866	Chemical structure transformation maps; Biosynthesis of other secondary metabolites; Global and overview maps; Sensory system	404-86-4	HMDB0002227	2	pos	1.20726e+09
M293T976	11Z-Eicosenoic acid	293.283	975.5	310.287	12.0498	C20H38O2	[M+H-H2O]+	Fatty Acyls	Fatty acids and conjugates	C16526	Lipid metabolism	26764-41-0/5561-99-9	HMDB0002231	2	pos	1.55128e+07
M295T700	9-OxoODE	295.227	700	294.219	1.01617	C18H30O3	[M+H]+	Fatty Acyls	Lineolic acids and derivatives	C14766	Lipid metabolism	54232-59-6	HMDB0004669	2	pos	3.94048e+07
M295T811	9(S)-HPODE	295.227	811	312.23	2.03234	C18H32O4	[M+H-H2O]+	Fatty Acyls	Lineolic acids and derivatives	C14827	Lipid metabolism; Global and overview maps	29774-12-7	HMDB0006940	2	pos	1.15834e+07
M300T955	Palmitoylethanolamide	300.289	955.4	299.282	0.586101	C18H37NO2	[M+H]+	Carboximidic acids and derivatives	Carboximidic acids	C16512	Signaling molecules and interaction	544-31-0	HMDB0002100	2	pos	2.27321e+07
M383T908	Campesterol	383.366	907.6	400.37	3.39101	C28H48O	[M+H-H2O]+	Steroids and steroid derivatives	Ergostane steroids	C01789	Lipid metabolism; Chemical structure transformation maps; Global and overview maps; Metabolism of terpenoids and polyketides	474-62-4	HMDB0002869	2	pos	1.31215e+08
M397T864	beta-Sitosterol	397.382	863.9	414.386	4.02635	C29H50O	[M+H-H2O]+	Steroids and steroid derivatives	Stigmastanes and derivatives	C01753	Lipid metabolism; Chemical structure transformation maps; Global and overview maps	83-46-5	HMDB0000852	2	pos	1.15249e+08
M146T492_1	1H-Indole-3-carboxaldehyde	146.06	491.8	145.053	3.69606	C9H7NO	[M+H]+	Indoles and derivatives	Indoles	C08493		487-89-8	HMDB0029737	2	pos	1.3063e+08
M194T624	3,4-Methylenedioxyamphetamine	194.119	624	193.11	5.00494	C11H15NO2	[M+H]+	Benzodioxoles		C07577		4764-17-4 / 42542-10-9	HMDB0041931	2	pos	4.80633e+08
M279T889	Dibutyl phthalate	279.161	889.2	278.152	8.65025	C16H22O4	[M+H]+	Benzene and substituted derivatives	Benzoic acids and derivatives	C14214		84-74-2	HMDB0033244	2	pos	3.87212e+07
M169T556	Pyridoxamine	169.097	556.1	168.09	0.0350261	C8H12N2O2	[M+H]+	Pyridines and derivatives	Pyridoxamines	C00534	Metabolism of cofactors and vitamins; Global and overview maps; Digestive system	85-87-0	HMDB0001431	2	pos	9.74944e+07
M137T607	allopurinol	137.046	607	136.039	0.00464824	C5H4N4O	[M+H]+			C06816		315-30-0		2	pos	3.39806e+08
M167T118	Phenylephrine	167.092	117.7	167.095	14.3633	C9H13NO2	[M]+	Phenols	1-hydroxy-4-unsubstituted benzenoids	C07441		59-42-7	HMDB0002182	2	pos	4.2703e+08
M138T401	Isophorone	138.102	401.4	138.105	20.999	C9H14O	[M]+	Carbonyl compounds	Ketones	C14743		78-59-1	HMDB0031195	2	pos	2.03602e+09
M183T984	Harman	183.093	984.1	182.084	8.32363	C12H10N2	[M+H]+	Harmala alkaloids		C09209	Chemical structure transformation maps	486-84-0	HMDB0035196	2	pos	3.21907e+06
M163T274	Fructose-1P	163.06	274.2	180.063	24.1261	C6H12O6	[M+H-H2O]+	Carbohydrates and carbohydrate conjugates	Monosaccharides	C10906		57-48-7	HMDB0062538	2	pos	8.40064e+07
M204T328	N-Acetyl-D-galactosamine	204.088	328	221.09	24.6659	C8H15NO6	[M+H-H2O]+			C01132	Carbohydrate metabolism; Membrane transport; Global and overview maps	14215-68-0 1811-31-0/14215-68-0/1811-31-0		2	pos	1.32439e+09
M100T678	N-Methyl-2-pyrrolidinone	100.076	678.1	99.0684	3.23754	C5H9NO	[M+H]+	Extractables/Leachables; Industrial Chemicals; Textile Chemicals/Auxiliary/Dyes; Excipients/Additives/Colorants; Personal Care Products/Cosmetics		C11118		872-50-4		2	pos	1.09442e+08
M110T125_1	4-Aminophenol	110.06	124.9	109.053	2.03525	C6H7NO	[M+H]+	Benzene and substituted derivatives	Aniline and substituted anilines	C02372	Xenobiotics biodegradation and metabolism; Global and overview maps	123-30-8	HMDB0001169	2	pos	1.44451e+09
M130T521	Isoquinoline	130.065	520.7	129.058	2.1126	C9H7N	[M+H]+	Isoquinolines and derivatives		C06323		119-65-3	HMDB0034244	2	pos	1.06479e+08
M132T226	6-Hydroxyhexanoic acid	132.084	226.4	132.079	22.8887	C6H12O3	[M]+	Hydroxy acids and derivatives	Medium-chain hydroxy acids and derivatives	C06103	Xenobiotics biodegradation and metabolism; Global and overview maps	1191-25-9	HMDB0012843	2	pos	9.98115e+07
M133T89	D-Ornithine	133.097	89.5	132.09	0.402894	C5H12N2O2	[M+H]+	Carboxylic acids and derivatives	Amino acids, peptides, and analogues	C00515	Biosynthesis of other secondary metabolites; Global and overview maps	348-66-3	HMDB0003374	2	pos	4.49116e+07
M136T368	2-Phenylacetamide	136.076	367.8	135.068	4.48346	C8H9NO	[M+H]+	Benzene and substituted derivatives	Phenylacetamides	C02505	Amino acid metabolism; Xenobiotics biodegradation and metabolism; Global and overview maps	103-81-1	HMDB0010715	2	pos	7.43381e+08
M154T118	N-Acetylhistamine	154.097	118.4	153.09	1.14214	C7H11N3O	[M+H]+	Carboxylic acids and derivatives	Carboxylic acid derivatives	C05135	Amino acid metabolism	673-49-4	HMDB0013253	2	pos	4.20038e+08
M137T300	1-Methylnicotinamide	137.071	300.2	137.071	0.254028	C7H9N2O	[M]+	Pyridines and derivatives	Pyridinecarboxylic acids and derivatives	C02918	Metabolism of cofactors and vitamins; Global and overview maps; Digestive system	3106-60-3	HMDB0000699	2	pos	1.08135e+08
M166T352	Hordenine	166.122	351.9	165.115	3.85319	C10H15NO	[M+H]+	Benzene and substituted derivatives	Phenethylamines	C06199	Amino acid metabolism; Global and overview maps	539-15-1/NA	HMDB0004366	2	pos	3.68329e+08
M196T351	Tyrosine methylester	196.097	351.4	195.089	3.47135	C10H13NO3	[M+H]+	Carboxylic acids and derivatives	Amino acids, peptides, and analogues	C03404		1080-06-4	HMDB0029217	2	pos	1.08444e+08
M180T288	(R)-Salsolinol	180.1	288.1	179.095	10.9717	C10H13NO2	[M+H]+	Tetrahydroisoquinolines		C09642	Chemical structure transformation maps	525-72-4/27740-96-1	HMDB0005199	2	pos	2.10183e+09
M182T184	Beta-Tyrosine	182.067	183.8	181.074	1.20912	C9H11NO3	[M+H]+	Carboxylic acids and derivatives	Amino acids, peptides, and analogues	C04368	Amino acid metabolism		HMDB0003831	2	pos	4.49576e+07
M207T478	Scoparone	207.065	477.8	206.058	1.33292	C11H10O4	[M+H]+	Coumarins and derivatives		C09311		120-08-1	HMDB0030818	2	pos	4.53113e+08
M202T354	Asymmetric dimethylarginine	202.144	354.1	202.143	3.46288	C8H18N4O2	[M]+	Carboxylic acids and derivatives	Amino acids, peptides, and analogues	C03626		30315-93-6/220805-22-1	HMDB0001539	2	pos	4.85382e+07
M397T891	Clionasterol	397.38	890.7	414.386	4.11193	C29H50O	[M+H-H2O]+	Steroids and steroid derivatives	Stigmastanes and derivatives	C19654		83-47-6	HMDB0000649	2	pos	2.22122e+08
M181T378	Pyridostigmine	181.098	377.9	181.098	0.552188	C9H13N2O2	[M]+	Pyridines and derivatives	Methylpyridines	C07410		155-97-5	HMDB0014685	2	pos	3.03395e+08
M176T347	Indole-3-acetate	176.07	346.9	175.063	0.9996	C10H9NO2	[M+H]+	Indoles and derivatives	Indolyl carboxylic acids and derivatives	C00954	Chemical structure transformation maps; Amino acid metabolism; Signal transduction; Global and overview maps	87-51-4	HMDB0000197	2	pos	7.07415e+08
M196T526	Salicyluric acid	196.061	526.4	195.053	3.18268	C9H9NO4	[M+H]+	Benzene and substituted derivatives	Benzoic acids and derivatives	C07588		487-54-7	HMDB0000840	2	pos	5.66382e+08
M171T401	N6-Acetyl-L-lysine	171.112	400.9	188.116	21.8219	C8H16N2O3	[M+H-H2O]+	Carboxylic acids and derivatives	Amino acids, peptides, and analogues	C02727	Amino acid metabolism; Global and overview maps	692-04-6	HMDB0000206	2	pos	1.67355e+09
M244T119	Cytidine	244.092	118.8	243.085	0.626774	C9H13N3O5	[M+H]+			C00475	Membrane transport; Global and overview maps; Nucleotide metabolism	65-46-3		2	pos	1.64791e+08
M123T514	5-Hydroxypyrazinamide	123.044	514.1	123.043	3.72556	C5H5N3O	[M]+	Diazines	Pyrazines	C01956		13924-96-4 / 98-96-4	HMDB0001978	2	pos	2.88618e+08
M113T328	3-Methyl-2-oxovaleric acid	113.06	328	130.063	0.0890748	C6H10O3	[M+H-H2O]+	Keto acids and derivatives	Short-chain keto acids and derivatives	C03465		1460-34-0	HMDB0000491	2	pos	3.97441e+08
M114T444	1-Pyrroline-2-carboxylic acid	114.055	443.9	113.048	0.666346	C5H7NO2	[M+H]+	Pyrrolines		C03564	Amino acid metabolism	2139-03-9	HMDB0006875	2	pos	6.1988e+08
M114T655	Epsilon-caprolactam	114.091	654.9	113.084	0.218497	C6H11NO	[M+H]+	Lactams	Caprolactams	C06593	Xenobiotics biodegradation and metabolism; Global and overview maps	105-60-2	HMDB0062769	2	pos	6.33427e+07
M115T552	Dihydrouracil	115.039	551.7	114.043	0.602504	C4H6N2O2	[M+H]+	Diazines	Pyrimidines and pyrimidine derivatives	C00429	Metabolism of cofactors and vitamins; Metabolism of other amino acids; Global and overview maps; Nucleotide metabolism	504-07-4	HMDB0000076	2	pos	4.40131e+07
M118T208	L-2,4-diaminobutyric acid	118.066	207.9	118.074	0.00361872	C4H10N2O2	[M]+	Carboxylic acids and derivatives	Amino acids, peptides, and analogues	C03283	Amino acid metabolism; Global and overview maps	1758-80-1	HMDB0006284	2	pos	2.13646e+08
M136T606_2	Tetrahydropteridine	136.076	605.7	136.075	6.61396	C6H8N4	[M]+	Pteridines and derivatives		C05650		10593-78-9	HMDB0001216	2	pos	3.99745e+07
M123T146	4,5,6,7-Tetrahydroisoxazolo(5,4-c)pyridin-3-ol	123.05	146	140.059	8.66314	C6H8N2O2	[M+H-H2O]+			C13693		64603-91-4		2	pos	2.84597e+09
M132T88	N-Carbamoylputrescine	132.113	88.3	131.106	0.181662	C5H13N3O	[M+H]+	Carboximidic acids and derivatives	Carboximidic acids	C00436	Amino acid metabolism; Global and overview maps	6851-51-0	HMDB0033458	2	pos	7.21571e+07
M137T387	Methyl benzoate	137.06	386.8	136.052	0.175106	C8H8O2	[M+H]+			C20645		93-58-3		2	pos	1.53478e+08
M140T822	Acetylphosphate	139.987	822.3	139.988	2.85741	C2H5O5P	[M]+	Organic phosphoric acids and derivatives	Phosphate esters	C00227	Carbohydrate metabolism; Energy metabolism; Metabolism of other amino acids; Global and overview maps	590-54-5	HMDB0001494	2	pos	3.77116e+08
M149T628	2-Oxo-4-methylthiobutanoic acid	149.023	628.3	148.019	0.00635108	C5H8O3S	[M+H]+	Fatty Acyls	Fatty acids and conjugates	C01180	Chemical structure transformation maps; Amino acid metabolism; Biosynthesis of other secondary metabolites; Global and overview maps	583-92-6	HMDB0001553	2	pos	6.30001e+07
M149T386	7-Methyladenine	149.071	386	149.07	6.03739	C6H7N5	[M]+	Imidazopyrimidines	Purines and purine derivatives	C02241		935-69-3	HMDB0011614	2	pos	2.2743e+08
M162T533	L-Homophenylalanine	162.09	533.5	179.095	19.3349	C10H13NO2	[M+H-H2O]+			C17235	Amino acid metabolism; Biosynthesis of other secondary metabolites; Global and overview maps	943-73-7		2	pos	7.61345e+08
M163T126_1	2-Hydroxyadipic acid	163.076	125.7	162.053	7.8551	C6H10O5	[M+H]+	Fatty Acyls	Fatty acids and conjugates	C02360		18294-85-4	HMDB0000321	2	pos	4.29617e+08
M163T263	Methyl cinnamate	163.075	263.1	162.068	0.127983	C10H10O2	[M+H]+			C06358		103-26-4		2	pos	3.80979e+07
M164T393	1-Deoxynojirimycin	164.094	392.9	163.084	13.3377	C6H13NO4	[M+H]+	Piperidines		C16843		19130-96-2 / 73285-50-4	HMDB0035359	2	pos	3.03697e+08
M168T327	Isopyridoxal	168.065	327.1	167.058	3.42725	C8H9NO3	[M+H]+	Pyridines and derivatives	Pyridine carboxaldehydes	C06051	Metabolism of cofactors and vitamins	6560-46-9 / 66-72-8	HMDB0004290	2	pos	1.25797e+08
M188T571	(3S)-6-Acetamido-3-aminohexanoate	188.128	571.1	188.116	0.049314	C8H16N2O3	[M]+			C21604		131887-44-0		2	pos	1.33333e+08
M174T108	2-Oxoarginine	174.087	108.3	173.08	0.712286	C6H11N3O3	[M+H]+	Keto acids and derivatives	Short-chain keto acids and derivatives	C03771	Amino acid metabolism; Global and overview maps	3715-10-4	HMDB0004225	2	pos	5.44796e+07
M180T339	Coniferyl alcohol	180.077	339.4	180.079	8.88509	C10H12O3	[M]+	Phenols	Methoxyphenols	C00590	Chemical structure transformation maps; Biosynthesis of other secondary metabolites; Global and overview maps	458-35-5 / 32811-40-8 458-35-5	HMDB0012915	2	pos	4.7433e+07
M181T464	Dulcin	181.098	464.2	180.09	2.34128	C9H12N2O2	[M+H]+	Benzene and substituted derivatives	N-phenylureas	C19415		150-69-6	HMDB0032565	2	pos	1.25635e+09
M183T305	Hydroxyphenyllactic acid	183.051	304.9	182.058	21.2797	C9H10O4	[M+H]+	Phenylpropanoic acids		C03672		306-23-0	HMDB0000755	2	pos	3.34664e+07
M188T732	3-Indoleacrylate	188.07	732	187.063	0.770727	C11H9NO2	[M+H]+			C21283				2	pos	1.02468e+08
M192T411	N,N-Diethyl-m-toluamide	192.138	410.7	191.131	1.5278	C12H17NO	[M+H]+			C10935		134-62-3		2	pos	1.91507e+08
M195T984	Neocnidilide	195.138	984.1	194.131	0.00202257	C12H18O2	[M+H]+	Lactones	Gamma butyrolactones	C17002		4567-33-3	HMDB0034450	2	pos	3.54752e+07
M196T981	3-Methyl-L-tyrosine	196.095	981.3	195.089	1.1179	C10H13NO3	[M+H]+			C20800				2	pos	2.65847e+08
M201T378	Abrine	201.102	377.8	218.106	20.0595	C12H14N2O2	[M+H-H2O]+			C02983		526-31-8		2	pos	3.89094e+08
M203T702	Sebacic acid	203.128	701.6	202.12	0.374149	C10H18O4	[M+H]+	Fatty Acyls	Fatty acids and conjugates	C08277		111-20-6	HMDB0000792	2	pos	2.83855e+07
M204T511	N5-(L-1-Carboxyethyl)-L-ornithine	204.123	510.7	204.111	1.37213	C8H16N2O4	[M]+			C04210				2	pos	1.46322e+08
M217T389	Tetrahydroharmine	217.133	388.9	216.126	1.73166	C13H16N2O	[M+H]+			C09243	Chemical structure transformation maps	17019-01-1		2	pos	1.0792e+08
M221T278	Pyrimidodiazepine	221.094	278.4	221.091	8.50795	C9H11N5O2	[M]+			C02587	Metabolism of cofactors and vitamins			2	pos	2.99846e+08
M231T81	N2-Succinyl-L-glutamic acid 5-semialdehyde	231.084	80.5	231.074	0.603316	C9H13NO6	[M]+	Carboxylic acids and derivatives	Amino acids, peptides, and analogues	C05932	Amino acid metabolism; Global and overview maps		HMDB0001180	2	pos	5.33854e+06
M251T322	5'-Deoxyadenosine	251.102	322.3	251.102	0.0444578	C10H13N5O3	[M]+	5'-deoxyribonucleosides		C05198		4754-39-6	HMDB0001983	2	pos	9.55523e+08
M258T87	Glycerophosphocholine	258.11	87.2	258.111	0.199822	C8H21NO6P	[M]+	Glycerophospholipids	Glycerophosphocholines	C00670	Lipid metabolism; Cancer: overview	28319-77-9	HMDB0000086	2	pos	1.33683e+09
M259T402	Saccharopine	259.128	402	276.132	12.8662	C11H20N2O6	[M+H-H2O]+	Carboxylic acids and derivatives	Amino acids, peptides, and analogues	C00449	Amino acid metabolism; Global and overview maps	997-68-2	HMDB0000279	2	pos	3.75412e+08
M263T615	1-(3,4-Dihydroxyphenyl)-5-hydroxy-3-decanone	263.166	614.8	280.168	20.6486	C16H24O4	[M+H-H2O]+			C17748	Biosynthesis of other secondary metabolites; Global and overview maps			2	pos	1.07804e+07
M273T538	Sotalol	273.123	537.7	272.12	1.0105	C12H20N2O3S	[M+H]+	Benzene and substituted derivatives	Sulfanilides	C07309		3930-20-9	HMDB0014632	2	pos	3.09031e+07
M280T299	Cyclopeptine	280.129	299.4	280.121	2.96372	C17H16N2O2	[M]+			C20579		50886-63-0		2	pos	1.32091e+08
M300T152_2	(S)-N-Methylcoclaurine	300.142	152.3	299.152	6.64001	C18H21NO3	[M+H]+	Isoquinolines and derivatives	Benzylisoquinolines	C05176	Chemical structure transformation maps; Biosynthesis of other secondary metabolites; Global and overview maps	3423-07-2	HMDB0060319	2	pos	6.38754e+09
M299T917	9,10-Dihydroxystearate	299.255	917.1	316.261	3.78941	C18H36O4	[M+H-H2O]+			C19622	Lipid metabolism			2	pos	4.19619e+07
M329T411	(S)-Reticuline	329.149	411.2	329.163	0.0756566	C19H23NO4	[M]+	Isoquinolines and derivatives	Benzylisoquinolines	C02105	Chemical structure transformation maps; Biosynthesis of other secondary metabolites; Global and overview maps	485-19-8	HMDB0003601	2	pos	9.89789e+08
M337T82	Kyotorphin	337.174	82.4	337.175	2.37266	C15H23N5O4	[M]+	Carboxylic acids and derivatives	Amino acids, peptides, and analogues	C02993		70904-56-2	HMDB0005768	2	pos	5.35971e+08
M406T693	Lisinopril	406.231	692.7	405.226	1.91451	C21H31N3O5	[M+H]+			C07077		76547-98-3		2	pos	3.00839e+07
M181T109	(3S,4R)-3,4-Dihydroxycyclohexa-1,5-diene-1,4-dicarboxylate	181.015	109.4	200.032	4.91675	C8H8O6	[M-H2O-H]-	Carboxylic acids and derivatives	Alcohols and polyols	C06318	Xenobiotics biodegradation and metabolism; Global and overview maps	161578-47-8		2	neg	4.99899e+07
M271T548	4-(3-Methylbut-2-enyl)-L-tryptophan	271.145	547.8	272.152	1.19493	C16H20N2O2	[M-H]-	Azacyclic compounds	Amines	C04290	Biosynthesis of other secondary metabolites; Global and overview maps			2	neg	9.20283e+07
M108T248	1,2-Benzoquinone	108.022	248.2	108.021	6.48022	C6H4O2	[M]-	Organic oxides	Carbonyl compounds	C02351		583-63-1	HMDB0012133	2	neg	4.0566e+08
M136T931	Phenylacetic acid	135.971	931.4	136.052	9.52783	C8H8O2	[M]-	Benzene and substituted derivatives		C07086	Amino acid metabolism; Xenobiotics biodegradation and metabolism; Global and overview maps	103-82-2	HMDB0000209	2	neg	5.18387e+07
M121T536	Phenylethylamine	121.03	536.4	121.089	10.1756	C8H11N	[M]-	Benzene and substituted derivatives	Phenethylamines	C05332	Amino acid metabolism; Global and overview maps	64-04-0	HMDB0012275	2	neg	3.21669e+07
M133T75	L-Malic acid	133.014	75.1	134.022	2.07496	C4H6O5	[M-H]-	Hydroxy acids and derivatives	Beta hydroxy acids and derivatives	C00149	Cancer: overview; Chemical structure transformation maps; Signal transduction; Sensory system; Endocrine system; Excretory system; Carbohydrate metabolism; Cancer: specific types; Energy metabolism; Global and overview maps	97-67-6 / 6915-15-7	HMDB0000156	2	neg	7.45579e+06
M137T460	4-Hydroxybenzoic acid	137.024	460	138.032	2.9192	C7H6O3	[M-H]-	Benzene and substituted derivatives	Benzoic acids and derivatives	C00156	Metabolism of cofactors and vitamins; Skeleton-based classification; Xenobiotics biodegradation and metabolism; Chemical structure transformation maps; Global and overview maps	99-96-7/456-23-5	HMDB0000500	2	neg	3.73015e+08
M137T102	Urocanic acid	137.036	102	138.043	0.5546	C6H6N2O2	[M-H]-	Azoles	Imidazoles	C00785	Amino acid metabolism; Global and overview maps	104-98-3	HMDB0000301	2	neg	1.93996e+07
M147T137	N-Methyl-D-aspartic acid	146.961	136.8	147.053	24.794	C5H9NO4	[M]-	Carboxylic acids and derivatives	Amino acids, peptides, and analogues	C12269		6384-92-5	HMDB0002393	2	neg	3.02358e+07
M146T501	Dimethylbenzimidazole	146.082	500.8	146.084	17.7982	C9H10N2	[M]-	Benzimidazoles		C03114	Metabolism of cofactors and vitamins; Global and overview maps	582-60-5	HMDB0003701	2	neg	3.27401e+08
M153T526	2,5-Dihydroxybenzoate	153.021	526.3	154.027	11.6062	C7H6O4	[M-H]-	Benzene and substituted derivatives	Benzoic acids and derivatives	C00628	Amino acid metabolism; Xenobiotics biodegradation and metabolism; Global and overview maps	490-79-9	HMDB0000152	2	neg	1.57131e+08
M172T407	N-Acetylleucine	172.1	406.5	173.105	10.9007	C8H15NO3	[M-H]-	Carboxylic acids and derivatives	Amino acids, peptides, and analogues	C02710		1188-21-2	HMDB0011756	2	neg	2.62054e+08
M174T75	N-Acetyl-L-aspartic acid	174.041	75.4	175.048	1.58583	C6H9NO5	[M-H]-	Carboxylic acids and derivatives	Amino acids, peptides, and analogues	C01042	Amino acid metabolism; Global and overview maps	997-55-7	HMDB0000812	2	neg	2.33893e+06
M178T620	Hippuric acid	178.049	619.5	179.058	13.0526	C9H9NO3	[M-H]-	Benzene and substituted derivatives	Benzoic acids and derivatives	C01586	Amino acid metabolism; Global and overview maps	495-69-2	HMDB0000714	2	neg	2.19761e+08
M163T715	Phenylpyruvic acid	163.076	714.9	164.047	29.8831	C9H8O3	[M-H]-	Benzene and substituted derivatives	Phenylpyruvic acid derivatives	C00166	Chemical structure transformation maps; Amino acid metabolism; Biosynthesis of other secondary metabolites; Global and overview maps	156-06-9	HMDB0000205	2	neg	1.00696e+07
M164T396_2	D-Phenylalanine	164.072	396	165.079	1.0727	C9H11NO2	[M-H]-			C02265	Amino acid metabolism; Sensory system; Global and overview maps	673-06-3		2	neg	7.00588e+08
M167T490	Uric acid	167.021	489.6	168.028	0.455032	C5H4N4O3	[M-H]-	Imidazopyrimidines	Purines and purine derivatives	C00366	Global and overview maps; Nucleotide metabolism; Digestive system	69-93-2	HMDB0000289	2	neg	1.30826e+08
M188T77	N-Acetylglutamic acid	188.057	76.8	189.064	1.9994	C7H11NO5	[M-H]-	Carboxylic acids and derivatives	Amino acids, peptides, and analogues	C00624	Amino acid metabolism; Global and overview maps	1188-37-0	HMDB0001138	2	neg	5.21268e+06
M173T93	L-Arginine	173.104	93.4	174.112	0.138645	C6H14N4O2	[M-H]-	Carboxylic acids and derivatives	Amino acids, peptides, and analogues	C00062	Cancer: overview; Membrane transport; Neurodegenerative disease; Biosynthesis of other secondary metabolites; Translation; Amino acid metabolism; Chemical structure transformation maps; Infectious disease: parasitic; Global and overview maps	74-79-3	HMDB0000517	2	neg	1.26194e+08
M181T88	Acetylcholine chloride	180.973	88.1	181.087	6.9674	C7H16NO2. Cl	[M]-			C08201		60-31-1		2	neg	9.43843e+06
M181T91	Mannitol	181.073	91.1	182.079	9.25592	C6H14O6	[M-H]-	Organooxygen compounds	Carbohydrates and carbohydrate conjugates	C00392	Carbohydrate metabolism; Membrane transport; Global and overview maps	69-65-8	HMDB0000765	2	neg	7.3506e+06
M206T392	N-Acetyl-L-phenylalanine	206.083	391.6	207.089	3.76547	C11H13NO3	[M-H]-	Carboxylic acids and derivatives	Amino acids, peptides, and analogues	C03519	Amino acid metabolism; Global and overview maps	2018-61-3	HMDB0000512	2	neg	6.80579e+09
M203T434	L-Tryptophan	203.083	433.7	204.09	2.34387	C11H12N2O2	[M-H]-	Indoles and derivatives	Indolyl carboxylic acids and derivatives	C00078	Cancer: overview; Nervous system; Digestive system; Development and regeneration; Biosynthesis of other secondary metabolites; Translation; Amino acid metabolism; Chemical structure transformation maps; Infectious disease: parasitic; Global and overview maps	73-22-3	HMDB0000929	2	neg	1.30756e+08
M223T761	Thymidine	223.029	761.2	242.09	4.51788	C10H14N2O5	[M-H2O-H]-	Pyrimidine nucleosides	Pyrimidine 2'-deoxyribonucleosides	C00214	Global and overview maps; Nucleotide metabolism	50-89-5	HMDB0000273	2	neg	1.07203e+08
M249T88	gamma-Glutamylcysteine	248.961	88.1	250.062	2.84655	C8H14N2O5S	[M-H]-	Carboxylic acids and derivatives	Amino acids, peptides, and analogues	C00669	Cell growth and death; Metabolism of other amino acids; Global and overview maps	636-58-8	HMDB0001049	2	neg	1.72653e+07
M265T924	Stearic acid	265.147	923.6	284.272	2.4514	C18H36O2	[M-H2O-H]-	Fatty Acyls	Fatty acids and conjugates	C01530	Lipid metabolism; Chemical structure transformation maps; Sensory system	57-11-4 / 646-29-7	HMDB0000827	2	neg	8.01223e+07
M269T526	Dehydroepiandrosterone	269.189	526.3	288.209	4.12349	C19H28O2	[M-H2O-H]-	Steroids and steroid derivatives	Androstane steroids	C01227	Cancer: overview; Endocrine system; Lipid metabolism; Xenobiotics biodegradation and metabolism; Cancer: specific types; Global and overview maps	53-43-0	HMDB0000077	2	neg	2.08459e+08
M299T901	all-trans-Retinoic acid	299.259	900.7	300.209	0.392919	C20H28O2	[M-H]-	Prenol lipids	Retinoids	C00777	Cancer: overview; Metabolism of cofactors and vitamins; Cancer: specific types; Immune system; Global and overview maps	302-79-4	HMDB0001852	2	neg	5.09133e+07
M309T791	Ribose 1,5-bisphosphate	309.174	791	309.986	1.72492	C5H12O11P2	[M-H]-	Organooxygen compounds	Carbohydrates and carbohydrate conjugates	C01151	Carbohydrate metabolism; Metabolism of other amino acids; Global and overview maps	14689-84-0	HMDB0011688	2	neg	4.33335e+07
M109T642	1,3-Benzenediol	109.029	641.8	110.037	2.75156	C6H6O2	[M-H]-	Benzene and substituted derivatives	Phenols and derivatives	C01751	Xenobiotics biodegradation and metabolism; Global and overview maps	108-46-3	HMDB0032037	2	neg	6.63487e+08
M109T243	Hydroquinone	109.029	243.2	110.037	4.58594	C6H6O2	[M-H]-	Phenols	Benzenediols	C00530	Amino acid metabolism; Xenobiotics biodegradation and metabolism; Global and overview maps	123-31-9	HMDB0002434	2	neg	1.25348e+09
M136T254	L-Histidine	136.048	253.9	155.07	20.6544	C6H9N3O2	[M-H2O-H]-	Carboxylic acids and derivatives	Amino acids, peptides, and analogues	C00135	Cancer: overview; Membrane transport; Metabolism of other amino acids; Digestive system; Biosynthesis of other secondary metabolites; Translation; Amino acid metabolism; Chemical structure transformation maps; Global and overview maps	71-00-1	HMDB0000177	2	neg	6.29914e+06
M151T128	Xanthine	151.026	128	152.033	1.16536	C5H4N4O2	[M-H]-	Imidazopyrimidines	Purines and purine derivatives	C00385	Chemical structure transformation maps; Biosynthesis of other secondary metabolites; Global and overview maps; Nucleotide metabolism	69-89-6	HMDB0000292	2	neg	9.29843e+08
M153T403	2-Pyrocatechuic acid	153.019	403.4	154.027	0.496669	C7H6O4	[M-H]-	Benzene and substituted derivatives	Benzoic acids and derivatives	C00196	Chemical structure transformation maps; Xenobiotics biodegradation and metabolism; Global and overview maps; Metabolism of terpenoids and polyketides	303-38-8	HMDB0000397	2	neg	3.93585e+08
M153T313	Protocatechuic acid	153.02	312.7	154.027	3.11071	C7H6O4	[M-H]-	Benzene and substituted derivatives	Benzoic acids and derivatives	C00230	Chemical structure transformation maps; Xenobiotics biodegradation and metabolism; Global and overview maps; Metabolism of terpenoids and polyketides	99-50-3	HMDB0001856	2	neg	9.0158e+08
M175T96	2-Isopropylmalic acid	175.061	95.8	176.069	1.00536	C7H12O5	[M-H]-	Fatty Acyls	Fatty acids and conjugates	C02504	Carbohydrate metabolism; Amino acid metabolism; Global and overview maps	3237-44-3	HMDB0000402	2	neg	4.83426e+07
M179T526	4-Hydroxyphenylpyruvic acid	179.035	526.1	180.042	0	C9H8O4	[M-H]-	Benzene and substituted derivatives	Phenylpyruvic acid derivatives	C01179	Metabolism of cofactors and vitamins; Biosynthesis of other secondary metabolites; Metabolism of terpenoids and polyketides; Amino acid metabolism; Chemical structure transformation maps; Global and overview maps	156-39-8	HMDB0000707	2	neg	7.39273e+07
M180T308	L-Tyrosine	180.067	307.9	181.074	0.422066	C9H11NO3	[M-H]-	Carboxylic acids and derivatives	Amino acids, peptides, and analogues	C00082	Cancer: overview; Metabolism of cofactors and vitamins; Metabolism of other amino acids; Chemical structure transformation maps; Nervous system; Endocrine system; Digestive system; Neurodegenerative disease; Biosynthesis of other secondary metabolites; Translation; Metabolism of terpenoids and polyketides; Amino acid metabolism; Substance dependence; Energy metabolism; Global and overview maps	60-18-4	HMDB0000158	2	neg	8.03298e+07
M202T636	Indolepyruvate	202.051	635.9	203.058	0.989848	C11H9NO3	[M-H]-	Indoles and derivatives	Indolyl carboxylic acids and derivatives	C00331	Amino acid metabolism; Global and overview maps	35656-49-6/392-12-1	HMDB0060484	2	neg	5.24092e+06
M211T638	Harmine	211.088	637.8	212.095	0	C13H12N2O	[M-H]-	Harmala alkaloids		C06538	Chemical structure transformation maps	442-51-3	HMDB0030311	2	neg	2.44291e+07
M251T300	Deoxyinosine	251.079	299.7	252.086	0	C10H12N4O4	[M-H]-	Purine nucleosides	Purine 2'-deoxyribonucleosides	C05512	Membrane transport; Global and overview maps; Nucleotide metabolism	890-38-0	HMDB0000071	2	neg	1.41952e+08
M123T415	3-Hydroxybenzyl alcohol glucoside	123.045	415.1	124.052	0.377942	C7H8O2	[M-H]-	Organooxygen compounds	Carbohydrates and carbohydrate conjugates	C03351	Xenobiotics biodegradation and metabolism; Global and overview maps	143995-98-6/620-24-6	HMDB0038331	2	neg	1.51734e+08
M137T637	3-Hydroxybenzoic acid	137.024	637.1	138.032	3.78074	C7H6O3	[M-H]-	Benzene and substituted derivatives	Benzoic acids and derivatives	C00587	Amino acid metabolism; Xenobiotics biodegradation and metabolism; Global and overview maps	99-06-9	HMDB0002466	2	neg	1.49942e+09
M149T434	Homogentisic acid	149.025	433.7	168.042	4.63011	C8H8O4	[M-H2O-H]-	Benzene and substituted derivatives	Phenylacetic acids	C00544	Amino acid metabolism; Metabolism of cofactors and vitamins; Xenobiotics biodegradation and metabolism; Global and overview maps	451-13-8	HMDB0000130	2	neg	6.87895e+07
M154T550	4-Nitrocatechol	154.015	550.2	155.022	1.14275	C6H5NO4	[M-H]-	Phenols	Nitrophenols	C02235	Xenobiotics biodegradation and metabolism; Global and overview maps	3316-09-4	HMDB0002916	2	neg	8.72591e+07
M131T86	3-Ureidopropionate	131.046	86.4	132.054	0.579948	C4H8N2O3	[M-H]-	Organic carbonic acids and derivatives	Ureas	C02642	Metabolism of cofactors and vitamins; Metabolism of other amino acids; Global and overview maps; Nucleotide metabolism	462-88-4	HMDB0000026	2	neg	8.49492e+06
M147T313	Phenyllactate	147.045	313.3	166.063	4.01237	C9H10O3	[M-H2O-H]-	Phenylpropanoic acids		C05607	Chemical structure transformation maps; Amino acid metabolism; Biosynthesis of other secondary metabolites; Global and overview maps	7326-19-4	HMDB0000563	2	neg	4.39205e+08
M151T223	3-Methylsalicylate	151.042	222.7	152.047	10.4342	C8H8O3	[M-H]-	Benzene and substituted derivatives	Benzoic acids and derivatives	C14088	Xenobiotics biodegradation and metabolism; Global and overview maps	c("45848-87-1", "83-40-9")	HMDB0002390	2	neg	9.33775e+07
M178T483	N-Acetylanthranilate	178.051	483.3	179.058	0.98848	C9H9NO3	[M-H]-	Benzene and substituted derivatives	Benzoic acids and derivatives	C06332	Chemical structure transformation maps	c("89-52-1", "2719-08-6")	HMDB0032388	2	neg	1.18427e+08
M165T93_1	Terephthalate	165.021	92.7	166.027	7.73237	C8H6O4	[M-H]-	Benzene and substituted derivatives	Benzoic acids and derivatives	C06337	Xenobiotics biodegradation and metabolism; Global and overview maps	c("100-21-0", "3198-30-9")	HMDB0002428	2	neg	6.21961e+07
M193T491	Ferulate	193.051	490.7	194.058	0.911677	C10H10O4	[M-H]-	Cinnamic acids and derivatives	Hydroxycinnamic acids and derivatives	C01494	Chemical structure transformation maps; Biosynthesis of other secondary metabolites; Global and overview maps	c("537-98-4", "1135-24-6")	HMDB0000954	2	neg	3.3891e+08
M335T852	PGA1	335.226	851.7	336.23	10.0708	C20H32O4	[M-H]-	Fatty Acyls	Eicosanoids	C04685		14152-28-4	HMDB0002656	2	neg	4.45376e+07
